# Supplementary material
Source: Springer Nature journal article supplement (https://www.springermedizin.de/resource/supplementary/12992_2010_114_MOESM1_ESM.pdf/9616490)
Supplement: MOESM1 [file 9616490]

**POWER OF SUPPLIERS**

**BARRIERS  
TO ENTRY/  
THREAT  
OF NEW  
MARKET  
ENTRANTS**

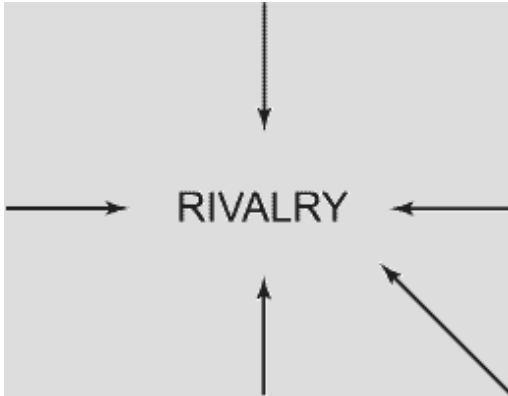

**THREAT OF  
SUBSTITUTES  
(INCLUDING  
TECHNOLOGY  
CHANGE)**

**BARGAINING POWER OF BUYERS**

**DEGREE OF RIVALRY**
